# Supplementary material for: Synthesis, structure and luminescence properties of novel NIR luminescent materials Li2ZnGe3O8:xMn2+
Source: Royal Society of Chemistry journal article supplement (doi:10.1039/c6tc03416k), 2016-11-23
Supplement: c6tc03416k1.pdf [file c6tc03416k1.pdf]

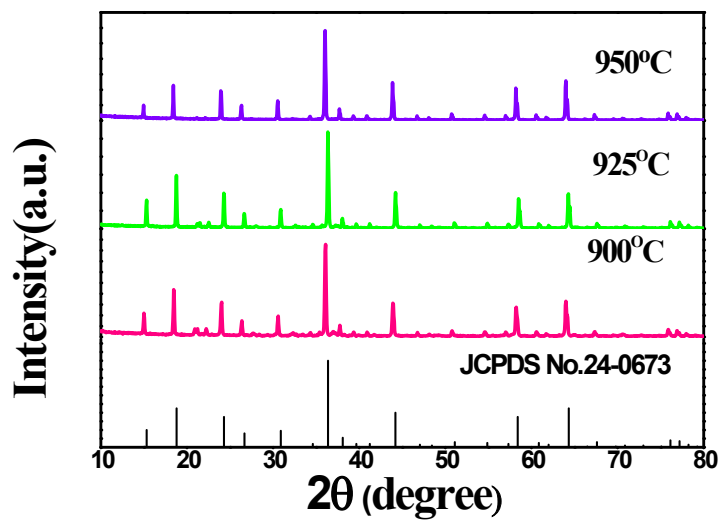

Fig.S1 XRD patterns of  $\text{LiZnGe}_3\text{O}_8$  heated at different temperature.

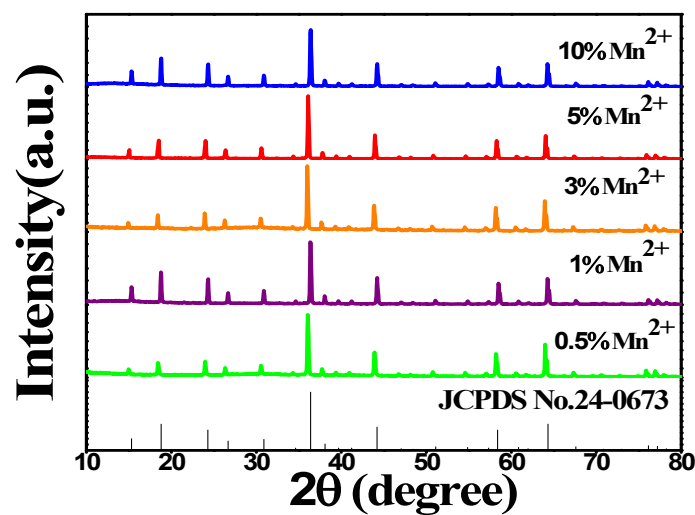

Fig.S2 XRD patterns of  $\text{LiZnGe}_3\text{O}_8$ :  $x\text{Mn}^{2+}$  ( $x=0.005, 0.01, 0.03, 0.05, 0.10$ ) heated at 950 for 3h.

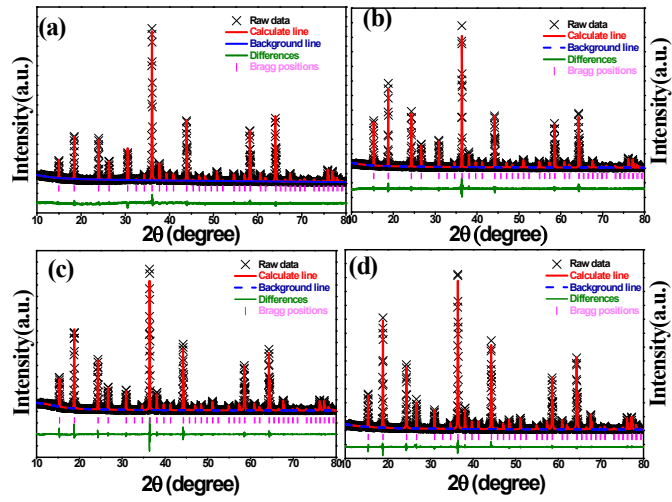

Fig.S3 (a), (b), (c), (d) Rietveld refinement of  $\text{Li}_2\text{ZnGe}_3\text{O}_8: 3\%\text{Mn}^{2+}$ ,  $\text{Li}_2\text{Zn}_{0.7}\text{Mg}_{0.3}\text{Ge}_3\text{O}_8: 3\%\text{Mn}^{2+}$ ,  $\text{Li}_2\text{Zn}_{0.5}\text{Mg}_{0.5}\text{Ge}_3\text{O}_8: 3\%\text{Mn}^{2+}$  and  $\text{Li}_2\text{Zn}_{0.3}\text{Mg}_{0.7}\text{Ge}_3\text{O}_8: 3\%\text{Mn}^{2+}$

**Table S1** Crystallographic data and details in the data collection and refinement parameters for the  $\text{Li}_2\text{ZnGe}_3\text{O}_8$ ,  $\text{Li}_2\text{ZnGe}_3\text{O}_8:3\%\text{Mn}^{2+}$  samples.

| Sample                  | $\text{Li}_2\text{ZnGe}_3\text{O}_8$ | $\text{Li}_2\text{ZnGe}_3\text{O}_8:3\%\text{Mn}^{2+}$ |
|-------------------------|--------------------------------------|--------------------------------------------------------|
| Space group             | P 43 3 2                             | P 43 3 2                                               |
| Symmetry                | cubic                                | cubic                                                  |
| 2 $\theta$ -interval(°) | 10-80                                | 10-80                                                  |
| a, Å                    | 8.183020                             | 8.199222                                               |
| b, Å                    | 8.183020                             | 8.199222                                               |
| c, Å                    | 8.183020                             | 8.199222                                               |
| V, Å <sup>3</sup>       | 547.950                              | 551.211                                                |
| R <sub>p</sub>          | 6.99%                                | 5.55%                                                  |
| R <sub>wp</sub>         | 9.05%                                | 7.59%                                                  |
| $\chi^2$                | 4.035                                | 4.156                                                  |
| $\alpha$ (°)            | 90.00                                | 90.00                                                  |
| $\beta$ (°)             | 90.00                                | 90.00                                                  |
| $\gamma$ (°)            | 90.00                                | 90.00                                                  |
| Z                       | 4                                    | 4                                                      |

**Table S2** Crystallographic data and details in the data collection and refinement parameters for part of the samples.

| Samples                                                                            | a/b/c (Å) | V(Å <sup>3</sup> ) |
|------------------------------------------------------------------------------------|-----------|--------------------|
| $\text{Li}_2\text{ZnGe}_3\text{O}_8:3\%\text{Mn}^{2+}$                             | 8.199222  | 551.211            |
| $\text{Li}_2\text{Zn}_{0.7}\text{Mg}_{0.3}\text{Ge}_3\text{O}_8:3\%\text{Mn}^{2+}$ | 8.193654  | 550.089            |
| $\text{Li}_2\text{Zn}_{0.5}\text{Mg}_{0.5}\text{Ge}_3\text{O}_8:3\%\text{Mn}^{2+}$ | 8.193233  | 550.004            |
| $\text{Li}_2\text{Zn}_{0.3}\text{Mg}_{0.7}\text{Ge}_3\text{O}_8:3\%\text{Mn}^{2+}$ | 8.18587   | 548.510            |
